# Supplementary material
Source: publisher figshare collection journal article supplement (https://frontiersin.figshare.com/ndownloader/files/26542802)
Supplement: Supplementary file 1 [file 26542802]

**Supplementary Table S1** List of primers. * = PCR primer pairs; unmarked = internal primers. Annealing temperatures (Ta ,°C) modified for amplification steps depending on enzymes (see Table S2).

| **Target gene** | **Primer name** | **Primer sequence (5'-3')** | **Ta,°C** | **References** |
| --- | --- | --- | --- | --- |
| 18S | 18S-EukF* | WAYCTGGTTGATCCTGCCAGT | 60 | Medlin et al. (1988) |
| 18S-EukR* | TGATCCTTCYGCAGGTTCACCTAC | 60 | Medlin et al. (1988) |
| 18S-581F | CAAGTCTGGTGCCAGCAGCCGC | 60 | Distel (2000) |
| 18S-560R | GCGGCTGCTGGCACCAGACTTG | 60 | Distel (2000) |
| 18S-926F | AAACTYAAAKGAATTGACGG | 52 | Lane (1991) |
| 18S-907R | CCGTCAATTCMTTTRAGTTT | 52 | Distel (2000) |
| 28S | 28S-NLF184-21* | ACCCGCTGAAYTTAAGCATAT | 58 | www.psb.ugent.be/rRNA |
| 28S-1600R* | AGCGCCATCCATTTTCAGG | 60 | Distel et al. (2011) |
| 28S-D23F | GAGAGTTCAAGAGTACGTG | 56 | Park and O’Foighil (2000) |
| 28S-D24R | CACGTACTCTTGAACTCTC | 56 | Park and O’Foighil (2000) |
| 28S-D5CF | ACACGGACCAAGGAGTCT | 52 | Park and O’Foighil (2000) |
| 28S-D4RB | TGTTAGACTCCTTGGTCCGTGT | 60 | Park and O’Foighil (2000) |
| 28S-D6R | CCAGCTATCCTGAGGGAAACTTCG | 60 | Park and O’Foighil (2000) |
| 28S-NLF105-22 | CCGAAGTTTCCCTCAGGATAGC | 60 | Park and O’Foighil (2000) |
| COI | mollF* | ATAATYGGNGGNTTTGGNAAYTG | 47 | Zuccon, D., pers. com. |
| HCO-2198* | ACTAAAAAACCAGTGGGACTTCAA | 47 | Folmer et al. (1994) |
|  |  |  |  |  |
